# Supplementary material
Source: Atypon-hosted journal article supplement (https://705.library.nashville.org/Record/CARL0000462275/DownloadSupplementalFile?fileId=175)
Supplement: DownloadSupplementalFile [file DownloadSupplementalFile]

**Flood 2010 Collection:  
Series III. Flood 2010 Oral Histories, 2011-2014**

**Collection Summary**

**Creator:** The Nashville Public Library, Special Collections Division

**Title:** Flood 2010 Oral Histories

**Inclusive Dates:** 2011-2014

**Summary/Abstract:** The Flood 2010 Oral Histories document the historic Middle Tennessee flood of May 1-2, 2010 and the aftermath, as told by the people who lived through it. The project includes 174 oral history interviews conducted by library staff and volunteers.

**Physical Description/Extent:** 4.0 cu. feet

**Series:** Two subseries: A. Audio recordings; B. Transcripts, indexes and notes

**Linking Entry Complexity Note:** Forms part of Flood 2010 Collection.

**Accession Number:** Interviews were conducted by library staff and volunteers between 2011 and 2014.

**Language:** English

**Stack Location:** Closed Stacks SCC oral histories

**Repository:** Special Collections Division, Nashville Public Library, 615 Church Street, Nashville, TN 37219

**Chronology**

- |                       |                                                                                                                                                                                                                                                                                         |
|-----------------------|-----------------------------------------------------------------------------------------------------------------------------------------------------------------------------------------------------------------------------------------------------------------------------------------|
| <b>May 2010</b>       | Flooding devastates Nashville and surrounding areas. Special Collections staff members begin to collect relief posters and other materials from local businesses affected by the flooding. A detailed project plan is devised to collect information about the Flood.                   |
| <b>September 2010</b> | Community partners and recording sites are identified. The Flood 2010 Digital History Project website is launched to provide updates on the project and information about getting involved.                                                                                             |
| <b>October 2010</b>   | Mayor Karl Dean and Library Director Donna Nicely announce the project to the community, which includes collecting oral histories and physical materials.                                                                                                                               |
| <b>January 2011</b>   | Mayor Karl Dean becomes the first person interviewed for the project, starting Phase I, which focused on interviews with government officials and first response teams. The Nashville Flood Digital History Project Flickr page is launched for community members to share photographs. |

**May 2011**

“Voices Rising: Remembering One Year Later” program is held at the Schermerhorn Symphony Center with Mayor Karl Dean, the Nashville Symphony, Vince Gill, and Will Hoge. Nashville Flood Anniversary Exhibit is unveiled. It travelled throughout the city until the end of the year.

**Biographical/Historical Sketch**

During May 1-2, 2010, Nashville received an unprecedented 13.57 inches of rainfall over a two-day period. The Cumberland River crested in Nashville at 51.86 feet, 12 feet above flood stage, with several other rivers and creeks breaking their banks. Flooding devastated areas throughout Nashville and surrounding counties and 11 people died as a result of the flood in Nashville. The Nashville Chamber of Commerce reported 2,773 businesses were impacted by the flood. The response from volunteers was overwhelming; volunteers, largely organized by Hands On Nashville, donated 332,756 hours of their time to help with various recovery projects. Some 25,870 volunteers helped with cleanup and repairs.

Mayor Karl Dean asked the Nashville Public Library to undertake documenting the flood of 2010. The oral history portion of the Library’s Flood 2010 Digital History Project began with an interview with Mayor Dean in January 2011. Library staff and volunteers conducted oral history interviews with citizens, city officials, and local organization leaders from different neighborhoods of Nashville and Middle Tennessee. Interviews were conducted at the Main Library and six other sites in the community. Sites included the Bellevue Family YMCA & J.L. Turner FiftyForward Center, the Bordeaux library branch, the Brentwood Library, Greater Bethel AME Church in downtown, Metropolitan Nashville Arts Commission, and Williamson County Public Library.

Institutions in Nashville and Middle Tennessee contributed significantly to the project by identifying and recommending individual interviewees. Partners included the Mayor’s Office, United Way of Middle Tennessee, Metro Arts Commission, The Brentwood Library, Restore the Dream Center, Impact Nashville, Aerial Innovations, Neighborhoods Resource Center, Matthew Walker Comprehensive Health Center, North Nashville/Bordeaux Neighborhood Association, Lipscomb University, Gentuso Photography, the Bellevue Family YMCA & FiftyForward J.L. Turner Center, and McGruder Family Resource Center

**Scope and Contents of the Collection**

The collection consists of 174 audio interviews with individuals concerning the May 1-2, 2010 flood in Nashville, Tennessee and surrounding areas. Individuals interviewed include first responders, city officials, musicians, artists, and others. Interviews were conducted in two stages (city officials & response teams, then business & community) and include information about the flooding, government response, relief efforts, and other topics. Themes include volunteerism, rescue efforts, the rebuild

process, and disaster relief. Each interview has at minimum interview notes and, in a few cases, complete transcripts.

### **Organization/Arrangement of Materials**

The Flood 2010 Collection is organized into the following series:

- I. Ephemera
- II. Manuscripts
- III. Oral Histories
- IV. Periodicals
- V. Photographs and Videos

This finding aid concerns only Series III. A separate finding aid is available for the rest of the Flood 2010 Collection.

Series III. Oral Histories is divided further into the following subseries by format:

- A. Audio recordings
- B. Transcripts, indexes, notes

Both subseries are arranged alphabetically by the last name of the interviewee, however, audio recordings use the prefix FDH for the project identifier.

### **Restrictions**

**Restrictions on Access:** In library use only. Available by appointment.

Some individual interviewee restrictions may apply.

**Restrictions on Use and Reproduction:** Copyright deeded to Nashville Public Library at time of creation. Some individual interviewee restrictions may apply.

### **Index Terms**

#### **Personal Names:**

Anders, Rogers  
Baker, Ruby D.  
Bauerschmidt, John  
Browning, Richard, Ph.D.  
Cain, Michael, -- director -- Harpeth River Watershed Association  
Castro, German -- pastor  
Creech, Laurel  
Dean, Karl F.  
Duffield, Mark, -- firefighter  
Eads, Tim  
Goss, Brian, -- firefighter  
Harris, Scott -- Office of Emergency Management  
Hinote, Greg  
Huggins, Damian  
Hughes, Jeff, 1963-  
Kalodimos, Demetria  
Mitchell, David, -- filmmaker  
Penney, Kevin

Potter, Scott, -- director -- Department of Water and Sewerage Services  
Pylkas, Matthew, -- police officer  
Walker, Mike, -- city manager

**Corporate Names/Organizations:**

Catholic Charities of Tennessee  
Cumberland River Compact  
Davidson County. Assessor's Office  
Donelson Fellowship Church (Nashville, Tenn.)  
Downtown Presbyterian Church (Nashville, Tenn.)  
El Shaddai Christian Church (Brentwood, Tenn.)  
Hands On Nashville  
Harpeth River Watershed Association  
Lighthouse Christian School (Antioch, Tenn.)  
Lipscomb University  
Metropolitan Nashville Arts Commission  
Metropolitan Nashville Police Department  
Nashville and Davidson County (Tenn.). Department of Public Works  
Nashville and Davidson County (Tenn.). Mayor's Office  
Nashville and Davidson County (Tenn.). Mayor's Office. Office of Emergency Management  
Nashville and Davidson County (Tenn.). Department of Water and Sewerage Services  
Neighborhoods Resource Center (Nashville, Tenn.)  
Soundcheck Nashville (Firm)  
Southeast Nashville Recovery Group  
St. David's Episcopal Church (Nashville, Tenn.)  
St. George's Episcopal Church (Nashville, Tenn.)  
Tennessee Immigrant and Refugee Rights Coalition  
Tennessee State University  
United States. Federal Emergency Management Agency  
United Way of Middle Tennessee  
Vanderbilt University

**Title as Subject:**

Nashvillest.com

**Subjects:**

Artists -- Tennessee, Middle -- Interviews  
Business enterprises -- Tennessee -- Nashville  
Businesspeople -- Tennessee, Middle  
Charities -- Tennessee -- Nashville  
Church buildings -- Tennessee -- Nashville  
Church work with disaster victims -- Tennessee  
Clergy -- Tennessee, Middle  
Commercial buildings-- Tennessee -- Nashville

Community arts projects -- Tennessee -- Nashville  
 Community centers – Tennessee – Nashville  
 Disaster relief – Tennessee  
 Disaster relief – United States – Case studies  
 Disaster relief – United States – Citizen participation  
 Disaster victims – Tennessee  
 Disasters – Psychological aspects  
 Disasters – Social aspects -- Tennessee  
 Dwellings – Fires and fire prevention -- -- Tennessee – Nashville – Personal narratives  
 Dwellings – Flood damage  
 Dwellings – Rehabilitation – Social aspects  
 Emergency Management – Tennessee – Nashville  
 Episcopalians -- Tennessee -- Nashville  
 Families -- Tennessee  
 Fire departments – Tennessee – Brentwood  
 First responders -- Tennessee  
 Flood damage – Economic aspects  
 Flood damage – Tennessee, Middle  
 Flood damage – Tennessee – Brentwood  
 Flood damage – Tennessee – Franklin  
 Flood damage – Tennessee – Nashville  
 Flood insurance claims – Tennessee, Middle  
 Floodplain management – Tennessee -- Nashville  
 Floods -- Cumberland River (Ky. and Tenn.)  
 Floods -- Harpeth River (Tenn.)  
 Floods – Social aspects -- Tennessee  
 Floods -- Stones River (Tenn.)  
 Floods -- Tennessee -- Nashville  
 Floods -- Tennessee -- Williamson County  
 Floods -- Tennessee, Middle  
 Generosity – Anecdotes  
 Government purchasing of real property—Tennessee—Nashville  
 Grief – Psychological aspects  
 Grief – Social aspects—Tennessee – Nashville – Personal narratives  
 Housing rehabilitation – Tennessee – Nashville  
 Housing subsidies – Tennessee – Nashville  
 Land use management – Tennessee – Nashville  
 Lifesaving -- Anecdotes  
 Local government -- Tennessee  
 Local officials and employees – Tennessee, Middle  
 Mayors – Tennessee – Nashville  
 Musicians – Tennessee – Nashville – Interviews  
 Natural disasters – Economic aspects  
 Natural disasters – Psychological aspects  
 Natural disasters – Social aspects

Natural disasters – Tennessee  
Photographers – Tennessee – Personal narratives  
Police – Tennessee – Brentwood  
Police -- Tennessee -- Nashville  
Public art – Tennessee -- Nashville  
Public shelters – Tennessee – Nashville  
Public works – Tennessee – Nashville  
Rainstorms – Tennessee, Middle  
Real property – Tennessee--Nashville  
Rescue work– Tennessee – Nashville  
Rescues – Tennessee – Nashville  
Rivers – Tennessee  
Roads – Flood damage  
State-local relations -- Tennessee  
Voluntarism – Tennessee – Nashville  
Volunteer workers in government – Tennessee – Nashville  
Volunteer workers in social service – Tennessee – Nashville  
Volunteers -- Management  
Volunteers – Tennessee, Middle  
Water treatment plants – Tennessee – Nashville  
Weather – Southern States  
Weather – Tennessee, Middle  
Weather – Tennessee -- Nashville

**Places:**

Antioch (Tenn.)  
Belle Meade (Tenn.)  
Bellevue (Tenn.)  
Bordeaux (Nashville, Tenn.)  
Brentwood (Tenn.) -- Flood, 2010  
Brentwood (Tenn.) -- Officials and employees  
Brentwood (Tenn.) – Politics and government – 21<sup>st</sup> century  
Cumberland River (Ky. and Tenn.) -- Flood, 2010  
Davidson County (Tenn.) -- Flood, 2010  
Donelson (Tenn.)  
Franklin (Tenn.) -- Flood, 2010  
Harpeth River (Tenn.) -- Flood, 2010  
Hermitage (Tenn.)  
Mill Creek (Davidson County, Tenn.)  
Nashville (Tenn.) – Buildings, structures, etc.  
Nashville (Tenn.) -- Flood, 2010  
Nashville (Tenn.) -- History -- 21<sup>st</sup> century – Sources  
Nashville (Tenn.) – Politics and government – 21<sup>st</sup> century  
Nashville and Davidson County (Tenn.) -- Officials and employees  
North Nashville (Nashville, Tenn.)  
Pennington Bend (Nashville, Tenn.)

Richland Creek (Davidson County, Tenn.)  
River Plantation (Bellevue, Tenn.)  
Stones River (Tenn.) -- Flood, 2010  
Tennessee – History – 21<sup>st</sup> century -- Sources  
Tennessee, Middle -- Flood, 2010  
West Meade (Nashville, Tenn.)  
West Nashville (Nashville, Tenn.)  
Williamson County (Tenn.) -- Flood, 2010

**Genre/Document Types:**

Interviews  
Oral histories (document genres)  
Transcripts

**Occupations:**

Artists  
Clergy  
First responders  
Mayors  
Musicians  
Police

**Added Author (Personal Name):**

Anders, Rogers  
Browning, Richard, Ph.D.  
Creech, Laurel  
Dean, Karl F.  
Eads, Tim  
Harris, Scott -- Nashville Office of Emergency Management  
Hinote, Greg  
Hughes, Jeff, 1963  
Kalodimos, Demetria  
Penney, Kevin  
Potter, Scott, -- director -- Department of Water and Sewerage Services  
Pylkas, Matthew, -- police officer  
Walker, Mike, -- city manager

**Added Author (Corporate Heading):**

Nashville and Davidson County (Tenn.). Mayor's Office

**Added Title:**

### **Associated and Related Material**

Nashville Flood Digital History Project Flickr:

<https://www.flickr.com/groups/nashvilleflood/>

A group started by the Nashville Public Library as part of the Flood 2010 Digital History Project as a place for community members to share photos of their flood experience. This group is not maintained by the library and the photos in it were not included in the collection unless individuals donated them directly to the Nashville Public Library (separate from uploading them to Flickr).

### **Separated Material**

#### **Administrative Information**

**Additional Physical Form Available:**

**Location of Originals/Duplicates:**

**Copyright:** Nashville Public Library retains intellectual property rights to this collection. Some restrictions may apply. This material may be protected by copyright law (Title 17 U.S. Code).

**Preferred Citation:** [Interviewee Name], Oral Histories Series, Flood 2010 Collection, Special Collections Division, Nashville Public Library.

**Immediate Source of Acquisition:** Oral histories initiated and created by Nashville Public Library and project partners and volunteers.

**Ownership and Custodial History:** Interviews were recorded by library staff and volunteers between 2011 and 2014, using a Marantz PMD671 solid state digital recorder. Interviews were recorded in .wav format at 48 khz and 16 bit and were converted to .mp3 files for access.

**Processing Information:** Preliminary processing performed by staff member Susannah Gibbons, 2013. Final processing and creation of finding aid by staff member Amber Williams, 2015. Additional assistance was provided by volunteers including students at Lipscomb University, Harvey Bennett, Marty O'Reilly, and Sarah T.

**Accruals:** No additional accruals are expected.

#### **Other Finding Aids**

A separate finding aid exists for the rest of the Flood 2010 Collection, excluding oral histories.

#### **Electronic Location and Access**

Excerpts from some oral histories are accessible at the Nashville Public Library's Digital Collections portal:

<http://nashville.contentdm.oclc.org/cdm/search/collection/all/searchterm/2010%20flood/field/all/mode/all/conn/and/order/nosort/display/200>



## References to Works by or about Collection Creator/Topic

Digital Exhibit produced by the Nashville Public Library:

Flooding Nashville website: <http://flood.nashvillepubliclibrary.org/>

## Detailed Description of the Collection

**Arrangement:** Recordings use the prefix FDH for the project identifier. Filed thereunder alphabetically by the last name of the interviewee. Cross references have been provided when multiple interviewees participated in a single interview.

| Person Interviewed                               | Interviewer         | Date       | Trans.? | Index? | Notes/Restrictions                                                      | Significance                                                                                                                                                         |
|--------------------------------------------------|---------------------|------------|---------|--------|-------------------------------------------------------------------------|----------------------------------------------------------------------------------------------------------------------------------------------------------------------|
| Anderson, Judy B.                                | Brennan, Jared      | 08/26/2011 | No      | No     |                                                                         | Recently moved to River Planation before the flood.                                                                                                                  |
| Anderson, Rogers                                 | Blackman, Andrea    | 10/28/2011 | No      | No     |                                                                         | Williamson County Mayor                                                                                                                                              |
| Andrews, Sue                                     | Richer, Annette     | 5/11/2011  | No      | No     |                                                                         | Member of St. George's Episcopal Church                                                                                                                              |
| Anthuis, Kevin                                   | Blackman, Andrea    | 03/25/2011 | No      | No     |                                                                         | Local artist in East Nashville. Art pieces are featured in the Metro Art Commission's Spirit of the River exhibit. Wants to capture the surreal nature of the flood. |
| Appel, Tom                                       | Herbst, Luke        | 04/06/2011 | No      | No     |                                                                         | Community organizer at the Neighborhoods Resource Center in Nashville, TN.                                                                                           |
| Armstrong, Kathie                                | Gibbons, Susannah   | 02/28/2011 | No      | No     |                                                                         | River Plantation resident. Her house was flooded.                                                                                                                    |
| Atkinson, Scott; Bills, Leslie Heldenberg, Billy | Aders, Bradley      | 4/27/2011  | No      | No     |                                                                         | Home was damaged in the flood and subsequently remodeled.                                                                                                            |
| Baganz, Nicole                                   | Martin, Rolicia     | 05/03/2011 | No      | No     | Restriction. Quotes require permission from interviewee. See agreement. | New Nashville resident that witnessed the flood.                                                                                                                     |
| Bailey, Deford Jr.                               | Blackman, Andrea    | 10/14/2011 | No      | No     |                                                                         | Rescued from his car during the flood on his way to church.                                                                                                          |
| Baker, Harry L III                               | Hall, Taffey        | 7/13/2011  | No      | No     |                                                                         | Director of Sports and Fitness Center at Gordon Jewish Community Center which served as a shelter during and after the flood.                                        |
| Baker, Ruby                                      | Butler, Deidre Hill | 03/3/2013  | Yes     | No     | Transcript Only. No Audio                                               | Resident of the Bordeaux neighborhood affected by the flood.                                                                                                         |
| Baker, Ruby D.                                   | Blackman, Andrea    | 02/25/2012 | No      | No     |                                                                         | President of Bordeaux Hills Residential Association. Established the Bordeaux Hills Disaster Relief Fund.                                                            |
| Barry, Mark                                      | Hall, Taffey        | 07/18/2011 | No      | No     |                                                                         | Employed by Catholic Charities of Tennessee and administered assistance during the flood.                                                                            |
| Bauerschmidt, John                               | Pilcher, Annette    | 08/17/2011 | No      | No     |                                                                         | Bishop of the Episcopal Diocese of Tennessee and resident of East Nashville.                                                                                         |

| Person Interviewed                                                        | Interviewer       | Date       | Trans.? | Index? | Notes/ Restrictions              | Significance                                                                                                                                                             |
|---------------------------------------------------------------------------|-------------------|------------|---------|--------|----------------------------------|--------------------------------------------------------------------------------------------------------------------------------------------------------------------------|
| Beard, Ernestine                                                          | Herbst, Luke      | 02/23/2011 | No      | No     |                                  | Resident of Bordeaux Hills subdivision and was affected by the flood.                                                                                                    |
| Belfiglio, Barbara                                                        | Pilcher, Annette  | 08/18/2011 | No      | No     |                                  | Resident of River Plantation in Bellevue affected by the flood.                                                                                                          |
| Bennett, Sidney                                                           | Herbst, Luke      | 04/07/2011 | No      | No     |                                  | Works at the Hermitage Community Center where she administered assistance during the flood.                                                                              |
| Berle, Amelia J.; Berle, Nathaniel J.; Berle, Nissa J.; Cyrus, Cynthia J. | Gibbons, Susannah | 03/16/2011 | No      | No     |                                  | Family lost several pets due to the flood and was displaced from their home for several days.                                                                            |
| <i>Bills, Leslie</i>                                                      |                   |            |         |        | <i>See Atkinson, Scott</i>       |                                                                                                                                                                          |
| Blaustone, Jan                                                            | Gibbons, Susannah | 08/26/2011 | No      | No     |                                  | Resident of Bellevue Riverwalk subdivision which borders the Harpeth River. Wrote a magazine article about the flood.                                                    |
| Brandau, Seawall                                                          | Pilcher, Annette  | 06/03/2011 | No      | No     |                                  | Engaged in the search effort to locate the Rutledge family that went missing during the flood.                                                                           |
| Bray, Kenneth                                                             | Herbst, Luke      | 08/26/2011 | No      | No     |                                  | Police officer in the Bellevue area. Helped people evacuate flooded homes.                                                                                               |
| Brown, Jason                                                              | Brennan, Jared    | 04/14/2011 | No      | No     |                                  | Public safety dispatcher for the Brentwood Police Department. Resident of Fairview, Tennessee and the only home in his neighborhood to flood.                            |
| Browning, Richard Jr.; Byars, Mozell; Johnson, Melvin                     | Gibbons, Susannah | 04/26/2012 | No      | No     |                                  | President of Tennessee State University rescued professor in the Department of Agricultural Sciences in floodwaters.                                                     |
| Burke, Gary                                                               | Gibbons, Susannah | 05/13/2011 | No      | No     |                                  | Provided assistance to people affected by the flood.                                                                                                                     |
| Burney, Ednaearle                                                         | Gibbons, Susannah | 02/24/2011 | No      | No     |                                  | Home was flooded.                                                                                                                                                        |
| Buttriss, Ben                                                             | Surber, Richard   | 04/17/2011 | No      | No     |                                  | Home was flooded and chose to rebuild instead of take a buyout.                                                                                                          |
| <i>Byars, Mozell</i>                                                      |                   |            |         |        | <i>See Browning, Richard Jr.</i> |                                                                                                                                                                          |
| Cain, Michael                                                             | Robinson, Robin   | 06/30/2011 | No      | No     |                                  | Director of Watershed Assessment and Restoration at the Harpeth River Watershed Association. Mentioned in Hands on Nashville's <i>Take my Hand</i> book about the flood. |
| Castro, German                                                            | Gibbons, Susannah | 11/08/2011 | No      | No     |                                  | St. Pastor of El Shaddai Christian Church in Franklin which flooded.                                                                                                     |
| Chambers, Margaret                                                        | Gibbons, Susannah | 02/22/2011 | No      | No     |                                  | Resident of Bordeaux. Home was flooded.                                                                                                                                  |
| Clark, Elsie                                                              | Brennan, Jared    | 08/26/2011 | No      | No     |                                  | Resident of River Plantation in Bellevue. Home as flooded.                                                                                                               |

| Person Interviewed                   | Interviewer          | Date       | Trans.? | Index? | Notes/Restrictions                                                      | Significance                                                                                                                                                       |
|--------------------------------------|----------------------|------------|---------|--------|-------------------------------------------------------------------------|--------------------------------------------------------------------------------------------------------------------------------------------------------------------|
| Collier, Anetta                      | Warkentin, Bettina   | 12/01/2011 | No      | No     | Restriction. Admin Only. See agreement.                                 |                                                                                                                                                                    |
| Collier, Linda                       | Makley, Mary         | 08/27/2011 | No      | No     |                                                                         |                                                                                                                                                                    |
| Contreras, Carla Christina           | Herbst, Luke         | 03/25/2011 | No      | No     |                                                                         | Local artist that had art displayed for spirit of flood project.                                                                                                   |
| Cornell, Margaret<br>Cothran, Scott  | Hall, Taffey         | 07/19/2011 | No      | No     |                                                                         | Archivist at Bellevue United Methodist Church. Assisted with disaster relief.                                                                                      |
| Cothran, Scott                       | Gibbons, Susannah    | 07/29/2011 | No      | No     | See also Cornell, Margaret                                              | Metro Police Officer                                                                                                                                               |
| Cover, Mia                           | Brennan, Jared       | 08/27/2011 | No      | No     |                                                                         | Home was flooded.                                                                                                                                                  |
| Creech, Laurel                       | Blackman, Andrea     | 02/09/2011 | No      | No     |                                                                         | Nashville's Chief Service Officer.                                                                                                                                 |
| Curry, Jason                         | Butler, Deidre, Hill | 03/17/2014 | Yes     | No     | Transcript Only. No Audio.                                              | Professor at Fisk University.                                                                                                                                      |
| Cyrus, Cynthia                       | Aders, Bradley       | 03/16/2011 | No      | No     | See also, Berle, Amelia J                                               | Resident of Bellevue. Home was flooded.                                                                                                                            |
| Davenport, Beth;<br>Davenport, Danny | Koczanski, Lexi      | 04/16/2011 | No      | No     |                                                                         | Provided assistance to neighbors affected by the flood.                                                                                                            |
| Day, Oralene                         | Brennan, Jared       | 02/24/2011 | No      | No     |                                                                         | Home was flooded.                                                                                                                                                  |
| Dean, Karl                           |                      | 01/20/2011 | No      | No     |                                                                         | Mayor of Nashville                                                                                                                                                 |
| DeForest, Amanda;<br>DeForest, Lee   | Gibbons, Susannah    | 05/05/2012 | No      | No     |                                                                         | Residents of Madison. Home was flooded.                                                                                                                            |
| Diana, Nancy                         | Surber, Richard      | 04/16/2011 | No      | No     |                                                                         | Photographer and resident of Nashville that documented the flood.                                                                                                  |
| Disney, Charlotte                    | Gibbons, Susannah    | 10/28/2011 | No      | No     |                                                                         | Pennington Bend resident. Home was flooded.                                                                                                                        |
| Duffield, Mark                       | Dockins, Frank IV    | 04/12/2011 | No      | No     |                                                                         | Captain in the Brentwood Fire Department that administered assistance during the flood.                                                                            |
| Eads, Tim                            | Pilcher, Annette     | 03/29/2011 | No      | No     |                                                                         | Chief of Police of Belle Meade.                                                                                                                                    |
| Earl, Barbara                        | Pilcher, Annette     | 08/27/2011 | No      | No     |                                                                         | Resident of River Plantation in Bellevue. Home was flooded.                                                                                                        |
| Edwards, Bryan;<br>Spriggs, Jenn     | Percell, Johnna      | 06/06/2011 | No      | No     |                                                                         | Home was flooded. Donated images of the flood to the project.                                                                                                      |
| Elder, Binji                         | Brennan, Jared       | 08/27/2011 | No      | No     |                                                                         | Home in Bellevue was flooded.                                                                                                                                      |
| Essary, Bryan                        | Pilcher, Annette     | 05/17/2011 | No      | No     |                                                                         | Member St. George's Episcopal Church affected by the flood.                                                                                                        |
| Estill, Ceci                         | Brennan, Jared       | 09/03/2011 | No      | No     | Restriction. Quotes require permission from interviewee. See agreement. | Bellevue resident affected by the flood and unhappy with the emergency response.                                                                                   |
| Etheridge, Daryl;<br>Olsen, Bryon    | Scott, Lindsay       | 04/22/2011 | No      | No     |                                                                         | Project Manager on construction project to rebuild Lighthouse Christian School. Part of the school was rebuilt as a part of the television show, Extreme Makeover. |
| Evans, Kelly                         | Herbst, Luke         | 04/26/2011 | No      | No     |                                                                         | River Plantation resident affected by the flood.                                                                                                                   |

| Person Interviewed                                                                     | Interviewer         | Date       | Trans.? | Index? | Notes/ Restrictions                                                            | Significance                                                                                                                                                 |
|----------------------------------------------------------------------------------------|---------------------|------------|---------|--------|--------------------------------------------------------------------------------|--------------------------------------------------------------------------------------------------------------------------------------------------------------|
| Farris, Dwight                                                                         | Blackman, Andrea    | 03/8/2011  | No      | No     |                                                                                | Resident of Bellevue/West Meade that recorded 72 hours of the flood.                                                                                         |
| Felts, Kathy; Zimmerman, Patti                                                         | Gibbons, Susannah   | 12/14/2011 | No      | No     |                                                                                | Retired teacher whose Davidson County home flooded.                                                                                                          |
| Fossik, Norene                                                                         | Gibbons, Susannah   | 08/26/2011 | No      | No     |                                                                                | Resident of River Plantation affected by the flood.                                                                                                          |
| Frink, Christy; Levy, Morgan                                                           | Herbst, Luke        | 5/14/2011  | No      | No     |                                                                                | Editors and founders of Nashvillest.com which aggregated all flood news on their Twitter feed.                                                               |
| Garrett, Margie                                                                        | Pilcher, Annette    | 09/07/2011 | No      | No     |                                                                                | Resident of River Plantation in Bellevue affected by the flood.                                                                                              |
| Gentuso, Tamara "Tammy"                                                                | Gibbons, Susannah   | 02/09/2011 | No      | No     |                                                                                | Freelance photojournalist that documented the flood and the recovery efforts in the Pennington Bend neighborhood in Nashville.                               |
| Gillhan, Scott                                                                         | Brennan, Jared      | 11/11/2011 | No      | No     |                                                                                | Resident of West Nashville that was affected by the flood. Performed two songs he wrote about the flood.                                                     |
| Goddard, Casey                                                                         | Gibbons, Susannah   | 02/17/2011 | No      | No     |                                                                                | Home was flooded.                                                                                                                                            |
| Gordon, Melissa                                                                        | Herbst, Luke        | 04/28/2011 | No      | No     |                                                                                | Neighborhood organizer at Neighborhoods Resource Center.                                                                                                     |
| Goss, Brian                                                                            | Ramsey, Cece        | 04/12/2011 | No      | No     |                                                                                | Assistant Fire Chief for Brentwood Fire and Rescue. Provided assistance during the flood.                                                                    |
| Grasman, Eric                                                                          | Pilcher, Annette    | 06/09/2011 | No      | No     |                                                                                |                                                                                                                                                              |
| Greenwood, Abby; Greenwood, Ally; Greenwood, Andie; Greenwood, Katie; Greenwood, Steve | Brennan, Jared      | 03/18/2011 | No      | No     | Abby, Ally, and Andie Greenwood lines printed but not signed in the agreement. | Father is the Children's Pastor of the Donelson Fellowship on McGavock Pike. The children's area at the church was flooded. The family home as also flooded. |
| Greenwood, Eric                                                                        | Pilcher, Annette    | 02/22/2011 | No      | No     |                                                                                | Rector of St. David's Episcopal Church in West Meade that served families in the church that was affected by the flood.                                      |
| Grimenstein, Owen                                                                      | Pilcher, Annette    | 07/13/2011 | No      | No     |                                                                                | Bellevue resident affected by the flood                                                                                                                      |
| Gunn, Andrea                                                                           | Brennan, Jared      | 08/26/2011 | No      | No     |                                                                                | President of the Somerset Farms Homeowners Association.                                                                                                      |
| Guschke, Jim                                                                           | Gibbons, Susannah   | 09/08/2011 | No      | No     |                                                                                | Building Inspector for the Metro Department of Codes and Building Safety.                                                                                    |
| Haggard, Steve                                                                         | Herbst, Luke        | 08/26/2011 | No      | No     |                                                                                | Affected by the flood.                                                                                                                                       |
| Hamilton-Roberts, Suzie                                                                | Allen, Sarah        | 03/17/2011 | No      | No     |                                                                                | Affected by the flood.                                                                                                                                       |
| Harnist, Sherri                                                                        | Griffith, Christian | 06/28/2011 | No      | No     |                                                                                | Resident of Antioch that was affected by the flood. Witnessed the Lighthouse Christian School float away during the flood.                                   |

| Person Interviewed       | Interviewer                         | Date       | Trans.? | Index? | Notes/ Restrictions             | Significance                                                                                                                 |
|--------------------------|-------------------------------------|------------|---------|--------|---------------------------------|------------------------------------------------------------------------------------------------------------------------------|
| Harrington, Lori         | Brennan, Jared                      | 08/27/2011 | No      | No     |                                 | Affected by the flood. Featured on the front cover of the Tennessean September 12 <sup>th</sup> , 2010 issue.                |
| Harris, Melissa          | Gibbons, Susannah                   | 08/26/2011 | No      | No     |                                 | Flood relief volunteer.                                                                                                      |
| Harris, Scott            | Brennan, Jared                      | 02/09/2011 | No      | No     |                                 | Senior Program Manager of Field Operations for Metro Office of Emergency Management.                                         |
| Hausken, Doug            | Gibbons, Susannah                   | 07/01/2011 | No      | No     |                                 | Executive Director of Cumberland River Compact. Included in Hands on Nashville's book <i>Take My Hand</i> .                  |
| Haynes, Lorenzana        | Pilcher, Annette                    | 08/27/2011 | No      | No     |                                 | Affected by the flood.                                                                                                       |
| <i>Heldenberg, Billy</i> |                                     |            |         |        | <i>See Atkinson, Scott</i>      |                                                                                                                              |
| Hinote, Greg             | Brennan, Jared                      | 06/17/2011 | No      | No     |                                 | Deputy Mayor of Nashville.                                                                                                   |
| Hodge, Mike              | Brennan, Jared                      | 4/28/2011  |         |        |                                 | Program Manager with the Neighborhoods Resource Center.                                                                      |
| Huggins, Damian          | Brennan, Jared                      | 03/02/2011 | No      | No     |                                 | Commander of Central Precinct during the flood. Currently the Deputy Chief, Investigative Services, Metro Police Department. |
| Hughes, Jeff             | Blackman, Andrea                    | 04/12/2011 | No      | No     |                                 | Assistant Chief of Police, City of Brentwood. Served as "Acting" Chief of Police during the flood.                           |
| Israel, Tiffany          | Blackman, Andrea                    | 03/25/2011 | No      | No     |                                 | Former staff member at Neighborhoods Resource Center.                                                                        |
| Jamison, Ruby            | Blackman, Andrea                    | 10/14/2011 | No      | No     |                                 | Member of Greater Bethel AME Church whose home flooded.                                                                      |
| Johnson, Ben             | Gibbons, Susannah                   | 10/27/2011 | No      | No     |                                 | Franklin resident whose home was flooded.                                                                                    |
| <i>Johnson, Melvin</i>   |                                     |            |         |        | <i>See Browning, Richard Jr</i> |                                                                                                                              |
| Jones, Timothy           | Pilcher, Annette                    | 06/07/2011 | No      | No     |                                 | Reverend of St. George's Episcopal Church.                                                                                   |
| Kalodimos, Demetria      | Blackman, Andrea                    | 04/06/2011 | No      | No     |                                 | Evening news anchor with WSMV television station.                                                                            |
| Keenan, Nan              | Pilcher, Annette                    | 07/19/2011 | No      | No     |                                 | Resident of Franklin, TN affected by the flood.                                                                              |
| Kimbro, Tana             | Robinson, Robin                     | 05/28/2011 | No      | No     |                                 | River Plantation resident affected by the flood.                                                                             |
| Kirk, Dawn               | Percell, Johnna                     | 05/05/2011 | Yes     | No     |                                 | Writer and therapist affected by the flood.                                                                                  |
| Klein, Don               | Blackman, Andrea                    | 02/22/2011 | No      | No     |                                 | Resident of River Plantation affected by the flood.                                                                          |
| Lambert, Mary Margaret   | Gibbons, Susannah; Herdon, Owen Jr. | 04/30/2011 | No      | No     |                                 | Resident of River Plantation that experienced the flood and lost loved ones in the flooding.                                 |
| Lape, Lora               | Gibbons, Susannah                   | 10/27/2011 | No      | No     |                                 | Franklin resident affected by the flood.                                                                                     |
| Law, Mike                | Pilcher, Annette                    | 05/24/2011 | No      | No     |                                 | Resident of Inglewood affected by the flood.                                                                                 |
| Leaver, Walt             | Hall, Taffey                        | 07/20/2011 | No      | No     |                                 | Vice-President of Public Relations at Lipscomb University which served as a shelter during the flood. .                      |

| Person Interviewed           | Interviewer                            | Date       | Trans.? | Index? | Notes/<br>Restrictions    | Significance                                                                                                                 |
|------------------------------|----------------------------------------|------------|---------|--------|---------------------------|------------------------------------------------------------------------------------------------------------------------------|
| LeMaster, Eb                 | Pilcher, Annette                       | 05/18/2011 | No      | No     |                           | Senior Warden of St. George's Episcopal Church.                                                                              |
| <i>Levy, Morgan</i>          |                                        |            |         |        | <i>See Frink, Christy</i> |                                                                                                                              |
| Lewis, Calvin                | Pilcher, Annette                       | 06/03/2011 | No      | No     |                           | Senior Warden of St. George's Episcopal Church.                                                                              |
| Linn, Steven                 | Gibbons, Susannah                      | 09/07/2011 | No      | No     |                           | Sergeant with Metro Police Department, West Precinct.                                                                        |
| Locke, Kenneth               | Hall, Taffey                           | 07/11/2011 | No      | No     |                           | Pastor of the Downtown Presbyterian Church.                                                                                  |
| Lopez, Denise                | Brennan, Jared                         | 09/16/2011 | No      | No     |                           | Bellevue resident affected by the flood.                                                                                     |
| LoPiccolo, John              | Buckingham, Alyssa;<br>Robinson, Robin | 04/14/2011 | No      | No     |                           | Lieutenant with the Brentwood Fire and Rescue department.                                                                    |
| Lue, Ginger                  | Robinson, Robin                        | 08/31/2011 | No      | No     |                           | Resident of Bellevue affected by the flood.                                                                                  |
| Lynch, Mandi                 | Griffith, Christian                    | 06/27/2011 | No      | No     |                           | Resident of Hermitage, TN that volunteered during the flood.                                                                 |
| Lytton, William              | Gibbons, Susannah                      | 02/24/2011 | No      | No     |                           | West Hamilton resident affected by the flood.                                                                                |
| Marfy, Valeria               | Brennan, Jared                         | 08/27/2011 | No      | No     |                           | Bellevue resident affected by the flood.                                                                                     |
| Martin, Philip;<br>Orr, Phil | Herbst, Luke                           | 08/26/2011 | No      | No     |                           | Representatives for United Way of Metropolitan Nashville.                                                                    |
| Mathey, Leslie Anne          | Gibbons, Susannah                      | 10/28/2011 | No      | No     |                           | Resident of Nashville affected by the flood.                                                                                 |
| McCullough, Carol            | Gibbons, Susannah;<br>Blackman, Andrea | 04/28/2011 | No      | No     |                           | Neighborhood organizer with Neighborhood Resource Center.                                                                    |
| McDonald, Rob                | Gibbons, Susannah                      | 08/26/2011 | Yes     | No     |                           | Bellevue resident affected by the flood.                                                                                     |
| McKenzie, Patrick            | Herbst, Luke                           | 06/13/2011 | No      | No     |                           | Bellevue resident affected by the flood.                                                                                     |
| Merritt, Troy Jr.            | Blackman, Andrea                       | 10/14/2011 | No      | No     |                           | Presiding Elder, South Nashville District, 13 <sup>th</sup> AME Church.                                                      |
| Messer, Kimberly             | Pilcher, Annette                       | 06/17/2011 | No      | No     |                           | Music librarian at St. George's Episcopal Church.                                                                            |
| Miller, Hugh                 | Aders, Bradley                         | 03/11/2011 | No      | No     |                           | Resident Manager at River Planation. .                                                                                       |
| Mills, David                 | Hall, Taffey                           | 07/11/2011 | No      | No     |                           | Associate Director of Communications, Neighborhood and Government Relations at Vanderbilt University. Affected by the flood. |
| Mitchell, David              | Gibbons, Susannah;<br>Martin, Rolicia  | 04/05/2011 | No      | No     |                           | Created documentary about the flood victims in North Nashville.                                                              |
| Moore, Robert                | Gibbons, Susannah                      | 11/09/2011 | No      | No     |                           | Pennington Bend resident affected by the flood.                                                                              |
| Morrison, Lisa               | Gibbons, Susannah                      | 03/09/2011 | No      | No     |                           | Bellevue resident affected by the flood. Home was severely damaged in the flood.                                             |
| Mosher, Bruce                | Brennan, Jared                         | 08/27/2011 | No      | No     |                           | Resident of River Plantation affected by the flood.                                                                          |
| Mullenex, Marty              | Herbst, Luke                           | 08/26/2011 | No      | No     |                           | Bellevue resident affected by the flood.                                                                                     |
| Murdock, Alan                | Robinson, Robin                        | 05/19/2011 | Yes     | No     |                           | Owner of Art House Gardens. Organized flood relief effort in East Nashville.                                                 |

| Person Interviewed               | Interviewer                           | Date       | Trans.? | Index? | Notes/Restrictions                                                      | Significance                                                                                                                                                                                     |
|----------------------------------|---------------------------------------|------------|---------|--------|-------------------------------------------------------------------------|--------------------------------------------------------------------------------------------------------------------------------------------------------------------------------------------------|
| Murphree, Janie                  | Pilcher, Annette                      | 08/24/2011 | No      | No     |                                                                         | Resident of River Plantation affected by the flood.                                                                                                                                              |
| Nabours, Amy                     | Gibbons, Susannah                     | 05/07/2012 | No      | No     |                                                                         | Resident of Bellevue affected by the flood. Her husband is the Director of Harpeth Youth Soccer Association.                                                                                     |
| Nelson, James Jr                 | Brennan, Jared                        | 08/27/2011 | No      | No     |                                                                         | Works for the Fire Department and is stationed at Engine 11 in North Nashville.                                                                                                                  |
| Nichols, Jeff                    | Robinson, Robin                       | 06/30/2011 | No      | No     |                                                                         | Executive Pastor of the Donelson Fellowship Church. The church's children's center flooded, affecting a number of families.                                                                      |
| Nobles, Nikki                    | Pilcher, Annette                      | 08/27/2011 | No      | No     | Restriction. Quotes require permission from interviewee. See agreement. | Resident of River Plantation affected by the flood.                                                                                                                                              |
| O'Donnell, Sandy                 | Makley, Mary                          | 08/27/2011 | No      | No     |                                                                         | Home was flooded.                                                                                                                                                                                |
| O'Hare, Kristen Marie            | Brennan, Jared                        | 08/26/2011 | No      | No     |                                                                         | Flood relief volunteer through Red Cross and Hands On Nashville.                                                                                                                                 |
| O'Leary, John;<br>O'Leary, Nancy | Gibbons, Susannah                     | 10/31/2011 | No      | No     |                                                                         | Home caught fire and exploded during the flood.                                                                                                                                                  |
| <i>Olson, Bryon</i>              |                                       |            |         |        | <i>See Etheridge, Daryl</i>                                             |                                                                                                                                                                                                  |
| <i>Orr, Phil</i>                 |                                       |            |         |        | <i>See Martin, Philip</i>                                               |                                                                                                                                                                                                  |
| Owensby, Craig                   | Gibbons, Susannah;<br>Bennett, Harvey | 03/18/2011 | No      | No     |                                                                         | Metro employee with the Planning Department and resident whose home as damaged by the flood.                                                                                                     |
| Parr, Marion                     | Herbst, Luke                          | 08/26/2011 | No      | No     |                                                                         | Resident of Bellevue affected by the flood.                                                                                                                                                      |
| Penney, Kevin                    | Blackman, Andrea                      | 02/03/2011 | No      | No     |                                                                         | Deputy Director for the Office of Emergency Management and the Director for Metro's Emergency Operations Center (EOC).                                                                           |
| Post., Amelia                    | Pilcher, Annette                      | 08/09/2011 | No      | No     |                                                                         | Youth organizer at Tennessee Immigrant and Refugee Rights Coalition. Worked with flood relief for the immigrant community.                                                                       |
| Potter, Scott                    | Blackman, Andrea                      | 02/04/2011 | Yes     | No     |                                                                         | Director of Nashville Metro Water Services.                                                                                                                                                      |
| Pylkas, Matt                     | Gibbons, Susannah                     | 08/09/2011 | No      | No     |                                                                         | Officer with the West Precinct of the Metro Nashville Police Department during the flood. Awarded the Tennessee Homeland Security First Responder Award for his heroic actions during the flood. |
| Ragland, Lynn                    | Gibbons, Susannah                     | 06/28/2011 | No      | No     |                                                                         | St. George's Episcopal Church Coordinator of Lay Ministries and Pastoral Care.                                                                                                                   |
| Rajotte, Fran                    | Herbst, Luke                          | 08/26/2011 | No      | No     |                                                                         | Resident of Bellevue affected by the flood.                                                                                                                                                      |
| Rebecca, Monette                 | Gibbons, Susannah                     | 07/08/2011 | No      | No     |                                                                         | Executive Director of the Richland Creek Watershed Alliance.                                                                                                                                     |

| Person Interviewed                | Interviewer         | Date       | Trans.? | Index? | Notes/ Restrictions       | Significance                                                                                           |
|-----------------------------------|---------------------|------------|---------|--------|---------------------------|--------------------------------------------------------------------------------------------------------|
| Regen, Cynthia;<br>Regen, Damon   | Pilcher, Annette    | 08/27/2011 | No      | No     |                           | Residents of Pasquo, TN affected by the flood.                                                         |
| Rice, Jeannie                     | Gibbons, Susannah   | 09/08/2011 | No      | No     |                           | Bellevue resident affected by the flood.                                                               |
| Richards, Dr. James               | Brennan, Jared      | 08/27/2011 | No      | No     |                           | Resident of Bellevue affected by the flood.                                                            |
| Richardson, Rich                  | Dockins, Frank IV   | 04/13/2011 | No      | No     |                           | Operations Superintendent for the Public Works Department in Brentwood, TN.                            |
| Riebau, Sarah                     | Pilcher, Annette    | 09/28/2011 | No      | No     |                           | Resident of Bellevue affected by the flood.                                                            |
| Ritter, Seth                      | Pilcher, Annette    | 08/27/2011 | No      | No     |                           | Owner of a local business, Caption Link, which was affected by the flood.                              |
| Rivas, Lisa                       | Blackman, Andrea    | 03/25/2011 | No      | No     |                           | Artist.                                                                                                |
| Robinson, Ann;<br>Robinson, Derek | Hall, Kristin       | 07/02/2011 | No      | No     | Restriction.              | Affected by the flood.                                                                                 |
| Rogers, Dottie                    | Pilcher, Annette    | 08/13/2011 | No      | No     |                           | West Meade resident affected by the flood.                                                             |
| Rooker, George                    | Gibbons, Susannah   | 08/11/2011 | No      | No     |                           | Davidson County Assessor of Property.                                                                  |
| Sanders-Hunter, Thelma            | Gibbons, Susannah   | 02/22/2011 | No      | No     |                           | Affected by the flood.                                                                                 |
| Seldon, Debbie                    | Percell, Johnna     | 05/15/2011 | No      | No     |                           | Resident of Bellevue affected by the flood.                                                            |
| Senechal, Roger                   | Gibbons, Susannah   | 06/01/2011 | No      | No     |                           | Reverend of St. George's Episcopal Church which was affected by the flood.                             |
| Shaver, Richard                   | Griffith, Christian | 06/27/2011 | No      | No     |                           | Teacher at a flooded Metro school.                                                                     |
| Spangler, Todd                    | Pilcher, Annette    | 04/12/2011 | No      | No     |                           | City Engineer for the City of Brentwood.                                                               |
| <i>Spriggs, Jenn</i>              |                     |            |         |        | <i>See Edwards, Bryan</i> |                                                                                                        |
| Spriggs, Michael                  | Gibbons, Susannah   | 05/17/2011 | Yes     | No     |                           | Veteran Nashville guitarist. Discusses damage at Sound Check                                           |
| Spruill, Leigh                    | Pilcher, Annette    | 05/26/2011 | No      | No     |                           | Rector of St. George's Episcopal Church which was affected by the flood.                               |
| Stone, William                    | Butler, Deidre Hill | 06/11/2012 | Yes     | No     |                           | Affected by the flood.                                                                                 |
| Sulyeman, Remziya                 | Robinson, Robin     | 05/19/2011 | Yes     | No     |                           | Policy Coordinator for the Tennessee Immigrant and Refugee Rights Coalition (TIRC).                    |
| Sullivan, Michael                 | Pilcher, Annette    | 08/27/2011 | No      | No     |                           | Volunteer Sergeant with OEM                                                                            |
| Sultan, Allie                     | Blackman, Andrea    | 03/25/2011 | No      | No     |                           | Artist whose work was featured in the Spirit of the River Exhibit. Created video documentary "Capture" |
| Tanner, Darla                     | Brennan, Jared      | 04/13/2011 | No      | No     |                           | Owner of Williams Wholesale Supply of Nashville which was damaged by the flood.                        |
| Taylor, Robert                    | Brennan, Jared      | 03/22/2011 | No      | No     |                           | Affected by the flood.                                                                                 |
| Taylor, Tom                       | Pilcher, Annette    | 08/05/2011 | No      | No     |                           | Organized outreach efforts for St. George's Episcopal Church, which flooded.                           |
| Thomas, Melissa                   | Gibbons, Susannah   | 03/28/2012 | Yes     | No     |                           | Executive Director of Southeast Nashville Recovery in Antioch.                                         |
| Traub, Jim                        | Mansour, Carol      | 03/14/2011 | No      | No     |                           | Affected by the flood.                                                                                 |



| <b>Person Interviewed</b> | <b>Interviewer</b> | <b>Date</b> | <b>Trans.?</b> | <b>Index?</b> | <b>Notes/<br/>Restrictions</b> | <b>Significance</b>                                                 |
|---------------------------|--------------------|-------------|----------------|---------------|--------------------------------|---------------------------------------------------------------------|
| Turner, Laura             | Gibbons, Susannah  | 10/27/2011  | No             | No            |                                | Stranded and rescued during the flood.                              |
| Turner-Yovanovitch, Zoe   | Surber, Richard    | 04/26/2011  | No             | No            |                                | Berry Hill area near Woodmont Blvd. resident affected by the flood. |
| Vaughn, Yolanda           | Blackman, Andrea   | 04/28/2011  | No             | No            |                                | Interim Executive Director of the Neighborhoods Resource Center.    |
| Voorhees, Jay             | Ramsey, Cece       | 03/24/2011  | No             | No            |                                | Antioch resident affected by the flood.                             |
| Walker, Mike              | Ramsey, Cece       | 04/13/2011  | No             | No            |                                | City Manager of Brentwood, TN.                                      |
| Warren, Carol             | Warkentin, Bettina | 11/03/2011  | No             | No            |                                | Williamson County resident affected by the flood.                   |
| White, Annette            | Pilcher, Annette   | 07/26/2011  | No             | No            |                                | Resident of Bellevue affected by the flood.                         |
| Whitehead, Cliff          | Brennan, Jared     | 08/27/2011  | No             | No            |                                | Affected by the flood.                                              |
| Wiggs, Mikell             | Brennan, Jared     | 08/26/2011  | No             | No            |                                | Sergeant with the Metro Police Department.                          |
| Williams, Joanna          | Pilcher, Annette   | 05/18/2011  | No             | No            |                                | Affected by the flood.                                              |
| Woodmore, Virginia        | Herbst, Luke       | 08/26/2011  | No             | No            |                                | River Plantation resident affected by the flood.                    |
| <i>Zimmerman, Patti</i>   |                    |             |                |               | <i>See Felts, Kathy</i>        |                                                                     |
| Zuch, Tiffani             | Robinson, Robin    | 04/16/2011  | No             | No            |                                | Affected by the flood.                                              |
